# Supplementary material
Source: Springer Nature journal article supplement (https://www.springermedizin.de/resource/supplementary/12911_2011_507_MOESM1_ESM.pdf/9526000)

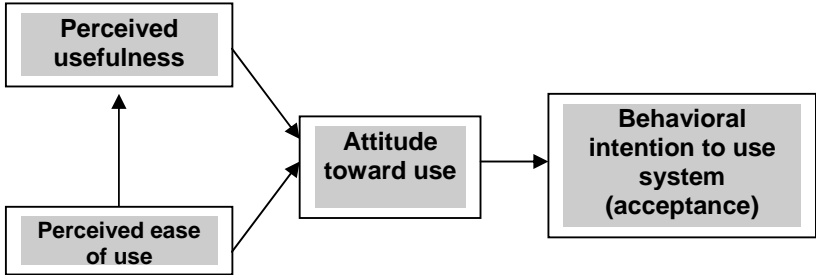

Supplement: MOESM1 [file 9526000]
